# Supplementary material
Source: PubMed Central journal article supplement (PMC2668031)
Supplement: mmc1.pdf [file mmc1.pdf]

**Supplemental Data**

**Mutations in Radial Spoke Head Protein Genes**

***RSPH9* and *RSPH4A* Cause Primary Ciliary Dyskinesia**

**with Central Microtubular Pair Abnormalities**

Victoria H. Castleman, Leila Romio, Rahul Chodhari, Robert A. Hirst, Sandra C.P. de Castro, Keith A. Parker, Patricia Ybot-Gonzalez, Richard D. Emes, Stephen W. Wilson, Colin Wallis, Colin A. Johnson, Rene J. Herrera, Andrew Rutman, Mellisa Dixon, Amelia Shoemark, Andrew Bush, Claire Hogg, R. Mark Gardiner, Orit Reish, Nicholas D.E. Greene, Christopher O'Callaghan, Saul Purton, Eddie M.K. Chung, and Hannah M. Mitchison

A.

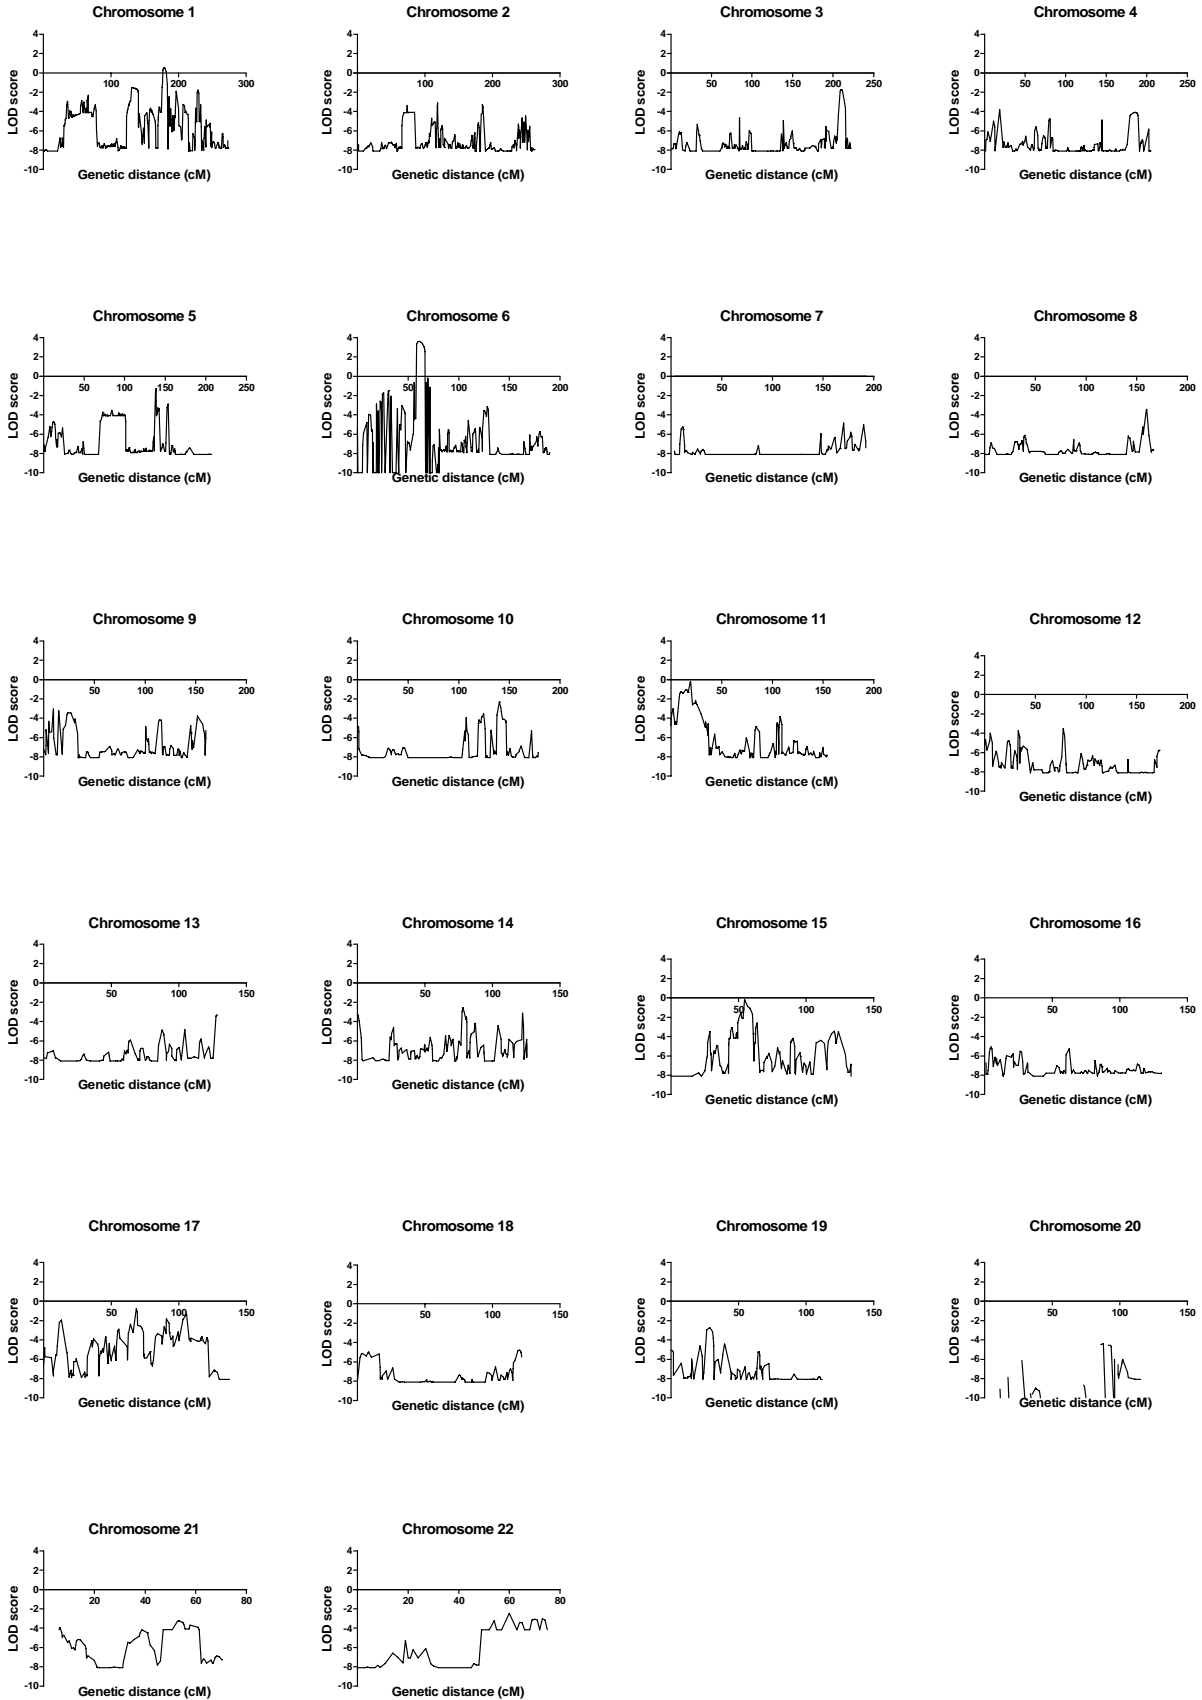

B.

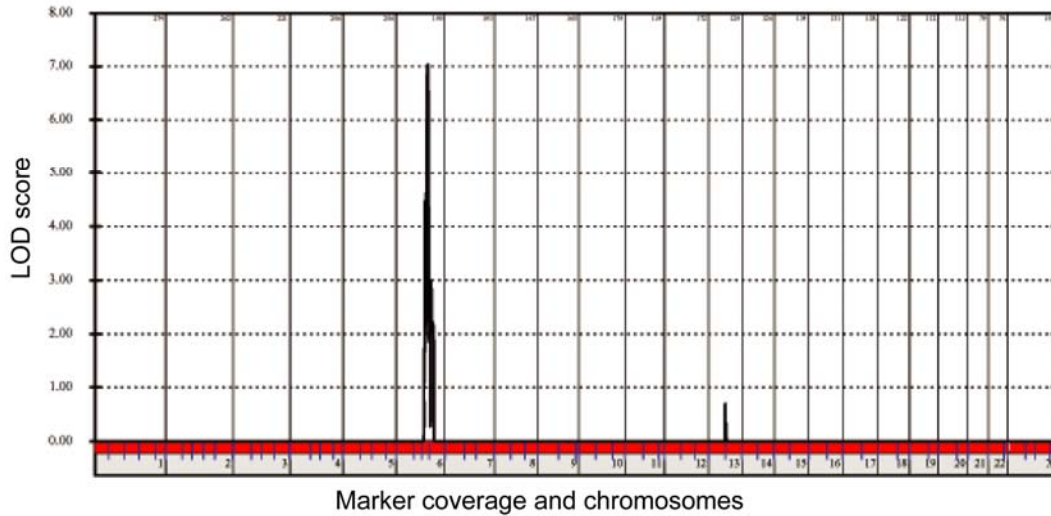

**Figure S1. Whole Genome *RSPH9* and *RSPH4A* Linkage Scan Results**

- (A) Genome scan results for Family UCL152 showing results for all chromosomes. Family UCL146 was subsequently genotyped across the UCL152 chromosome 6 *RSPH9* locus to generate the joint lodscore for both families shown in Figure 1. Analysis was performed using GENEHUNTER 2.1r5.
- (B) Genome scan results for the five transposition defect families linked to *RSPH4A*: UCL105, UCL131, UCL132, UCL138 and UCL170, showing results for all chromosomes. Analysis was performed using MERLIN 1.01 within *easyLINKAGE*.

**A RSPH9**

|                           |                                |              |
|---------------------------|--------------------------------|--------------|
|                           | p.Lys268del                    |              |
| Human                     | LTFYHAPRTKNGYVYVGTGE           | NMDLPFML 276 |
| Canis familiaris          | LTFYHAPRTKNGYIYMGTE            | NIDLFPML 246 |
| Bos taurus                | LTFYHAPRTKNGYIYVGTGE           | NIDLFPML 276 |
| Sus scrofa                | LTFYHAPRTKNGYIYVGTGE           | NMDLPFML 276 |
| Monodelphis domestica     | LTFYHAPRTKNGYIYVGTGE           | NIDLFPML 276 |
| Ornithorhynchus anatinus  | LTFYHAPRTKNGYIYVGTGE           | NMDLPFML 276 |
| Mus musculus              | LTFYHAPRTKNGYIYVGTGE           | NMDLPFML 276 |
| Gallus gallus             | LTFYHAPRTKNGYIYVGTGE           | NIDLFPML 275 |
| Danio rerio               | FTFFHVPTQFHGHIYMGDGLNLDLPFML   | 277          |
| Apis mellifera            | MMFYHKLNSPHYGFLYFGHGK          | NMDIVFMV 279 |
| Drosophila melanogaster   | MTFFHKINSHKHGFLYLGDK           | NFDLLEFY 281 |
| Nematostella vectensis    | FTFFHVPTKRYGMVYIGTGN           | NIDLFPML 246 |
| Xenopus tropicalis        | MTFYHVPLTPLHGHLYIGTGERNLDLPFI  | 277          |
| Chlamydomonas reinhardtii | YFFYYAANELTWGSLYVGDGLRNNDLIFML | 269          |
| Tetrahymena thermophila   | FVGYHRANSQIFGYAYIGNGI          | NSDLPELL 296 |
| Trypanosoma brucei        | SLFWYRPGSKDCQGYVCSGERDFEVCFLL  | 297          |

**NCBI ID numbers:**  
 Human NP\_689945; C.familiaris XP\_851950; B.taurus XP\_612744; S.scrofa XP\_001927232; M.domestica XP\_001362778; O.anatinus XP\_001506544; M.musculus NP\_083614; D.rerio NP\_001025284; G.gallus XP\_419496; A.mellifera XP\_001121220; D.melanogaster NP\_724049; N.vectensis XP\_001619872; X.tropicalis NP\_001005021; C.reinhardtii ABC02020; T.thermophila ABB03904; T.brucei XP\_828524.

**B RSPH4A**

**CLUSTAL 2.0.8 multiple sequence alignment.**  
**Human RSPH4A (NP\_001010892)**  
**against Chlamydomonas RSP4 (XP\_001700728) and RSP6 (XP\_001700729):**

|        |                                                              |           |
|--------|--------------------------------------------------------------|-----------|
| RSP4   | -----                                                        |           |
| RSP6   | -----                                                        |           |
| RSPH4A | MEDSTSPKQEKENQEELGETRRPWEGKTAASPQYSEPESEPLEAKQGPETGRQSRSSRP  | 60        |
|        | p.Pro87Ser                                                   | p.Gln109X |
| RSP4   | -----                                                        |           |
| RSP6   | -----                                                        |           |
| RSPH4A | WSPQSRAKTPLGGPAGPETSSPAPVSREPSSSSPLAPARQDLAAPPSDRTTSVIPEA    | 120       |
|        | p.Gln154X                                                    |           |
| RSP4   | -----                                                        |           |
| RSP6   | -----                                                        |           |
| RSPH4A | GTPYPDPLEQSSDKRESTPHHTSQSEGNTFQSSQPKPHLCGRRDVSYNNAKQKELRFDV  | 180       |
| RSP4   | -----MAAVDSVAQALAYLVQVHSPQDGTSMYDHLVKLVS                     | 36        |
| RSP6   | -----MAADVQALAFLLQVKTQGASIEYGLKAALAK                         | 34        |
| RSPH4A | FQEEDSNSDYDLQQPAPGGSEVAPSMLEITIQNAKAYLLKTSNSGFNLYDHLNMLTKI   | 240       |
| RSP4   | LEDQPKNAVLDLLETSLLVKSTFDPKESSPLVPIPVADPATQQAASVIFGDPELPI     | 96        |
| RSP6   | LEDRPVNAVEALETSVLSTPPAAN--LSVPLVPAASAAAAAAVAKASLFGDPEVLDPE   | 92        |
| RSPH4A | LNERNENAVDIFEN---ISQDVKMAHFSKFDALQENELLPYIEAKQKALFLQGHLE     | 297       |
| RSP4   | TGEPVPADPPNEFEAENMLGAAAVLDCLGVGLGRELGVNIALAAKRIGEDPKLAVRSVRF | 156       |
| RSP6   | SGEPIDDPAPNEFECEDEVEDGDLLDGLGVGLGRQEMAAVLAVKRLGEDAKRGVSTVRF  | 152       |
| RSPH4A | GVDQLEDEIAENALPNVMSAFYFEQAGVGLGTDETYRIFLALKQLTDT--HPIQR      | 355       |
| RSP4   | FGKFLGLYSDFVFEVAFKKEAAEAAPAPERVEGEAASSS-----AP               | 202       |
| RSP6   | FGKFFGTQADYYVFTTLLQSNPDMPEAPEG-----                          | 182       |
| RSPH4A | WGIKILGLEMNYIAEVEFREGEDEEEVEEEDVAEERDNGESEAHEDEDELPKSFYKAPQ  | 415       |
| RSP4   | EVPVEEPGKANKFTYLVCSLGGPLRLPDVTPAQVKASRIKLLTGRLTSHVSTYPA      | 262       |
| RSP6   | TIPLEPYGEGVNAIYFVSNLGGPLQLPYVTPAQIKASRLRLRYLTGRLDAPVSAFPA    | 242       |
| RSPH4A | AIPKEESRTGANKYVVCNEPGRPWVWKLPPVIPAQIVIAKIKKFTGRLDAPISYPP     | 475       |
|        | p.Arg490X                                                    |           |
| RSP4   | FPGNEANYLRALIAISAAATVVPASDLFSLNDETGERAEDWEPPAGRE-----        | 312       |
| RSP6   | FPGNEANYLRALIAISAAATVCCPRGFTADDDSAELSANDEWVPLKGRE-----       | 292       |
| RSPH4A | FPGNESNYLRAQIAISAGTHVSPGLGFYQFGEEGEVEEAEAGGRNSFEENPDFEGIQVI  | 535       |
| RSP4   | --MAAPTAWVHVRPHLKSQGRGRC---EVHKRELPEDADEDE--FYNEDELEEGPDLAAL | 364       |
| RSP6   | --MALPVNWSHRYAHLKGGRT---VTHKRDPDEEEPEKNFWTAEMEAGPPPLATL      | 346       |
| RSPH4A | DLVESLSNWHVHQHILSQGRCNWFNSIQNEEEEEEEDEEKDSDSYIEQEVGLPLLTPI   | 595       |
| RSP4   | EEDAQLPGEQ-----AAWTPIYSSASEAVKQAGGLRSLVWPGAVCGGRGSEWTCVYVG   | 418       |
| RSP6   | DTDAPLPAATGDKVPPPAWSVFPASASVTRNQVAGVRSNRWPGAVCACAGRHTSMYVG   | 406       |
| RSPH4A | SEDLIEQNIPI-----PWTTRLSSN-LIPQYIAVQLSNLWPGAYAFSNGKFFENFYIG   | 647       |
| RSP4   | WGKVN--APFVPLPPPVAQEF-----AWGEVETQELKLP--APPPPE              | 458       |
| RSP6   | WGIKAG-GEWSPCPPPPVPQWGA-----PAAGVEGGQQLLECNLPPKPA            | 452       |
| RSPH4A | WGHKYSPTNYTPVPPVPPVYQYPSGPEITEMDDPSVEEQAFRAAQEAULLAAENEESSE  | 707       |
| RSP4   | EEAEADE-- 465                                                |           |
| RSP6   | PEEEDE-- 459                                                 |           |
| RSPH4A | DEDEEDDYD 716                                                |           |

**Figure S2. Evolutionary Conservation of Amino Acid Residue Changes in RSPH9 and Homology of RSPH4A**

(A) Conservation of RSPH9 amino acid Lys268 across multiple species and phyla (red).  
(B) Alignment of human RSPH4A and the two *Chlamydomonas* homologs, RSP4 and RSP6 which are 31% and 30% percent identical to human respectively. The *Chlamydomonas* proteins are shorter and align to the human protein C-terminus starting from position Ile211. The radial spoke domain in RSPH4A (Pfam PF04712) is located at positions c.207-697 of NP\_001010892. Human mutations identified in PCD patients are highlighted in red. Alignment of 16 species (not shown) shows the RSPH4A Pro87, Gln109 and Gln154 residues are located in a mammalian specific N-terminal region not present in ciliate homologs. However, the C-terminal Arg490 is highly conserved between mammals and ciliates.

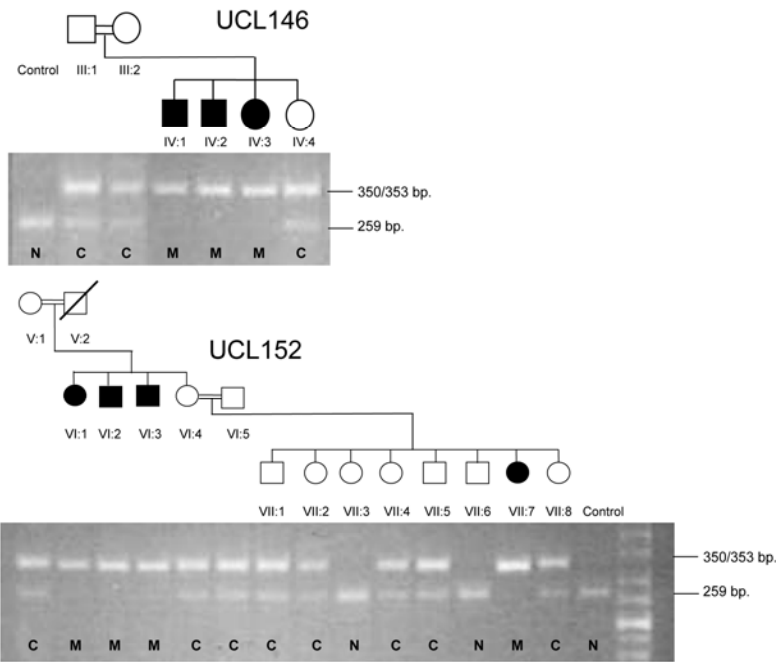

**Figure S3. Representative Example of Confirmation of Mutation Inheritance**

*MbolI* restriction digest of exon 5 PCR product confirming the *RSPH9* c.804\_806delGAA mutation co-segregates with the disease status in both extended Bedouin kindreds, in accordance with haplotype data. N, wild-type allele homozygote; C, carrier; M, homozygous for mutation.

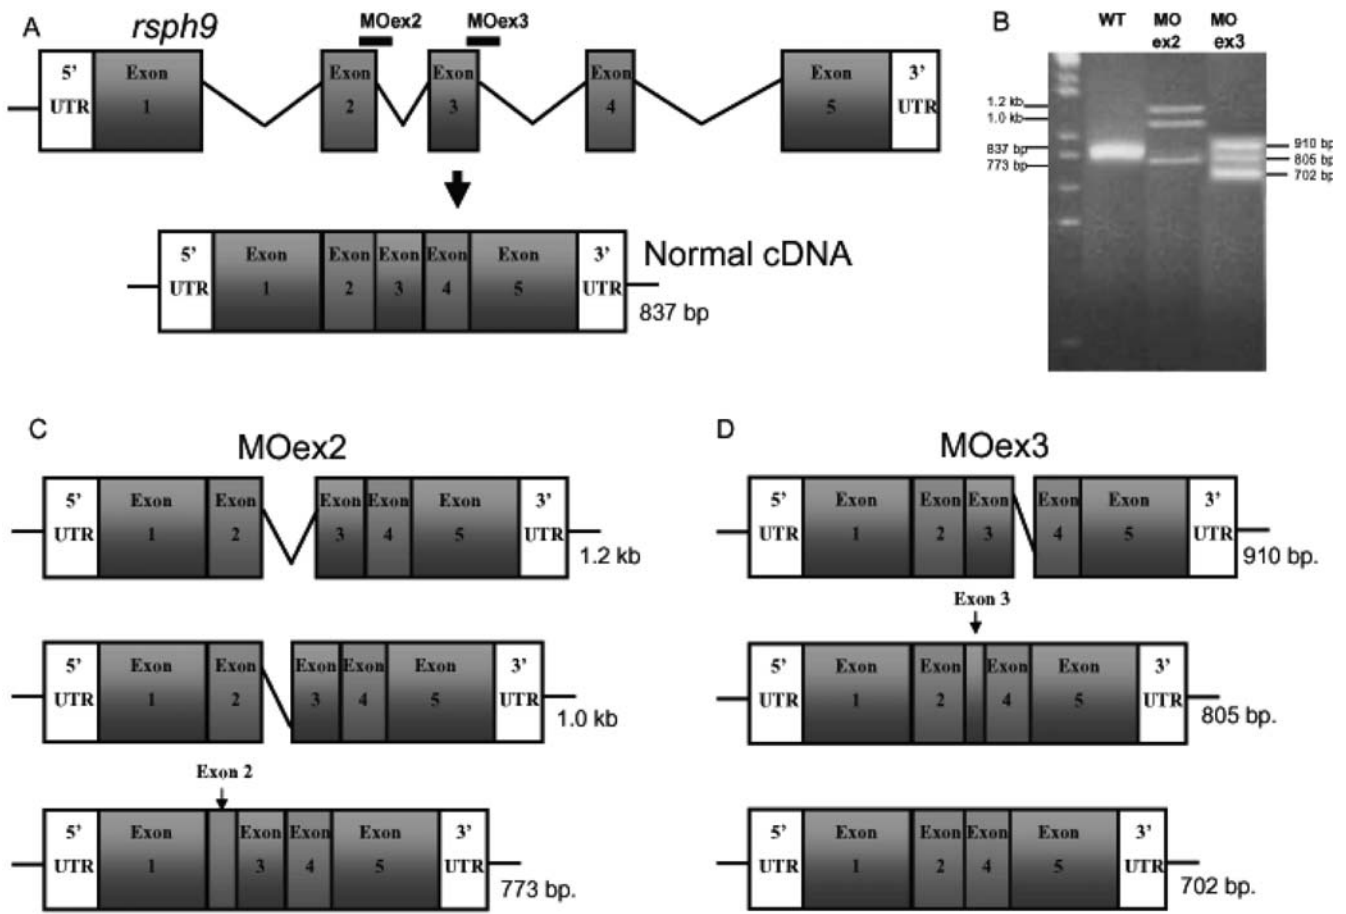

**Figure S4. Disruption of Zebrafish *rsph9* mRNA Splicing by Morpholino Injection**

(A) Genomic (7.2 kb) and cDNA (827 bp) structure of zebrafish *rsph9* indicating exon 2 (MOex2) and exon 3 (MOex3) MO location.

(B) RT-PCR of 72 hpf control or morpholino-injected embryos shows MO effectiveness indicating suppression of correct mRNA splicing persists for at least 72 hpf. 24 hours hpf showed the same results (not shown). An 837 bp fragment is generated in control embryos, but no wild-type mRNA was expressed after either MOex2 or MOex3 injection. Both only produced aberrant transcripts.

(C) Schematic of RT-PCR amplicons generated in MOex2-injected embryos. Three products were produced due to disrupted intron 2 splicing: either non-splicing (1.2 kb product), partial splicing of intron 2 (1.0 kb product), or deletion of 64 bp from the 3' end of exon 2 (773 bp product) presumably due to use of a cryptic splice donor in exon 2.

(D) Schematic of RT-PCR amplicons generated in MOex3-injected embryos. Three products were produced due to disrupted intron 3 splicing: either partial splicing of intron 3 (910 bp product) or a 28 bp deletion at the 3' end of exon 3 (805 bp product), presumably due to cryptic splice sites, or complete deletion of exon 3 (702 bp product). The MOex2 and MOex3 aberrant transcripts all predict premature truncation of the 277 residue protein due to frameshifts. This occurs for MOex2 after 155 amino acids in the 1.2 and 1.0 kb products, and after 111 amino acids in the 773 bp product; and for MOex3 after 205, 187 or 132 amino acids for the 910, 805 and 702 bp products, respectively.

**Table S1. Genomic Sequencing Primers**

| <b>Exon</b>          | <b>Primer 1</b>             | <b>Primer2</b>               |
|----------------------|-----------------------------|------------------------------|
| <b><i>RSPH9</i></b>  |                             |                              |
| Exon 1               | 5'-CCCAAACCTCTGGAAAGGATG-3' | 5'-CCATTCCACTCATCTCAGATCC-3' |
| Exon 2               | 5'-GCCCAACCCACTAGACAGAA-3'  | 5'-CCAGCCTGTTGCCATAATTT-3'   |
| Exon 3               | 5'-AGCGTGATCTGTGTGGCTCT-3'  | 5'-CTGCTGGACTCCCAGACATA-3'   |
| Exon 4               | 5'-GGTCCAGTGCAGACAGAAA-3'   | 5'-GTGAACCACCAATTCCCCT-3'    |
| Exon 5               | 5'-CCAGTGGAACCATAGCACCT-3'  | 5'-ACCAGACGGAGGTGGAGTTA-3'   |
| <b><i>RSPH4A</i></b> |                             |                              |
| Exon1.1              | 5'-AGGGGTTGTACCGAATCACA-3'  | 5'-TCAGGAATCACACTCGTGGT-3'   |
| Exon1.2              | 5'-GGACCAGAAACATCATCACC-3'  | 5'-CAGAGATACTCACACACCCT-3'   |
| Exon 2               | 5'-CTAATGACCCAGAAATGTC-3'   | 5'-GATCACGCCATTGTACTCCA-3'   |
| Exon 3.1             | 5'-TCACCATGTTGGCCAGTCTT-3'  | 5'-ATGAACCAGGAAGACCATGG-3'   |
| Exon 3.2             | 5'-GATGTAGCTGAAGAGAGGGA-3'  | 5'-ATCCCTGGGACCTTCAGTTA-3'   |
| Exon 4               | 5'-AGCACGGTCCTTTCCTTGAA-3'  | 5'-ATGGGAAGAGGATGAGACCT-3'   |
| Exon 5               | 5'-TCATGAAGTACCCTCCTGAT-3'  | 5'-CAGAGCAAGACTCTGTCTCA-3'   |
| Exon 6               | 5'-TGCTTGTGGTCTAGGTGTAG-3'  | 5'-ACACACCCCTTATATGGGAC-3'   |
